# Supplementary material for: Coordination-driven self-assembled Mn(ii)-metallostar with high relaxivity and synergistic photothermal and photodynamic effects
Source: Royal Society of Chemistry journal article supplement (doi:10.1039/d3ma00762f), 2023-01-01
Supplement: d3ma00762f1.pdf [file d3ma00762f1.pdf]

**Supporting Information for:**

**Coordination-driven Self-assembled Mn(II)-Metallostar  
Endowed with High Relaxivity and Synergistic Photothermal  
and Photodynamic Effects**

Huiyu Wu,<sup>1,2,§</sup> Zhenghui Li,<sup>1,4,§</sup> Yao, Liu,<sup>1,3</sup> Xingchi Shi,<sup>5</sup> Yuan Xue,<sup>1,3</sup> Zuhua Zeng,<sup>1,2</sup> Fanglin, Mi,<sup>4</sup> Haiying Wang<sup>1,\*</sup>  
and Jiang Zhu<sup>1,\*</sup>

<sup>1</sup> Medical Imaging Key Laboratory of Sichuan province, Department of Oncology, Affiliated Hospital of North Sichuan Medical College, Maoyuan Road 1, Nanchong City, Sichuan, 637000, China.

<sup>2</sup> School of Pharmacy, North Sichuan Medical College, Fujiang Road 234, Nanchong City, Sichuan, 637000, China

<sup>3</sup> School of Basic Medical Sciences and Forensic Medicine, North Sichuan Medical College, Fujiang Road 234, Nanchong City, Sichuan, 637000, China

<sup>4</sup> Department of Stomatology, North Sichuan Medical College, Fujiang Road 234, Nanchong City, Sichuan, 637000, China

<sup>5</sup> Department of Cardiovascular disease, School of Clinical Medicine, Affiliated Hospital of North Sichuan Medical College, Maoyuan Road 1, Nanchong City, Sichuan, 637000, China.

§ These authors contribute equally

\* Corresponding Author(s): Haiying Wang, [hywang@nsmc.edu.cn](mailto:hywang@nsmc.edu.cn); Jiang Zhu, [zhujiang@nsmc.edu.cn](mailto:zhujiang@nsmc.edu.cn)

## Table of Contents

1. **Figure S1.** Photograph of aqueous solutions of MnL,  $\text{TiL}_3\text{Mn}_3$  and  $\text{FeL}_3\text{Mn}_3$  (pH = 7.4).
2. **Figure S2.** Photograph of  $\text{FeL}_3\text{Mn}_3$  at pH = 7.4 and 9.0 (in Tris buffer, 0.1 M )
3. **Figure S3.** The stability of  $\text{FeL}_3\text{Mn}_3$  in the presence of 10 % FBS (at 37 °C) and the PBS solution (pH = 7.4, 10 mM) of  $\text{FeL}_3\text{Mn}_3$  was employed as the negative control.
4. Photothermal conversion efficiency measurement of  $\text{FeL}_3\text{Mn}_3$ .
5. **Figure S4.**  $^1\text{O}_2$  quantum yield measurement of  $\text{FeL}_3\text{Mn}_3$ .
6. **Figure S5.** Hyperthermia heating curves of BxPC-3 cells media with  $\text{FeL}_3\text{Mn}_3$  at various concentrations (0, 0.125, 0.25, 0.5 mM) under 808 nm laser ( $2 \text{ W cm}^{-2}$ ) irradiation for 6 min.
7. **Figure S6.** The change of absorption spectra of DPBF (20  $\mu\text{M}$ ) mixed with  $\text{FeL}_3\text{Mn}_3$  (120  $\mu\text{M}$ ) over time without (a) / with (b) ascorbate sodium (1.0 mM) under 808 nm laser irradiation ( $2.0 \text{ W cm}^{-2}$ )

**1. Photograph of aqueous solutions of three chelates.**

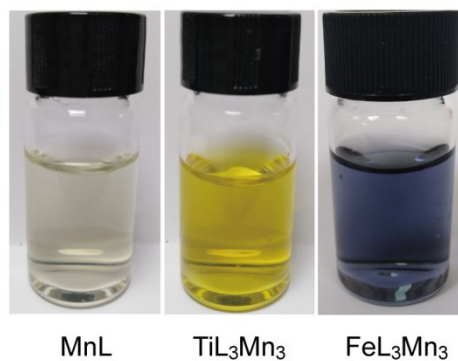

Figure S1 Photograph of aqueous solutions of MnL,  $TiL_3Mn_3$  and  $FeL_3Mn_3$  (pH = 7.4).

**2. Photograph of  $FeL_3Mn_3$  at different pH condition.**

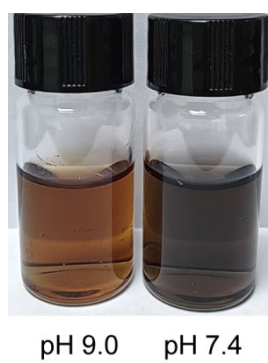

Figure S2 Photograph of  $FeL_3Mn_3$  at pH = 7.4 and 9.0 (in Tris buffer, 0.1 M ).

### 3. Stability of FeL<sub>3</sub>Mn<sub>3</sub> in different mediums

### 4. Photothermal conversion efficiency measurement of FeL<sub>3</sub>Mn<sub>3</sub>.

To calculate the photothermal conversion efficiency ( $\eta$ ) of FeL<sub>3</sub>Mn<sub>3</sub>, the FeL<sub>3</sub>Mn<sub>3</sub> solution (0.25 mM, 0.3 ml, in HEPES buffer, pH = 7.4, 0.1 M) was irradiated by 808 nm laser (2.0 W cm<sup>-2</sup>) for 10 min, and then the laser was shut off. The solution was naturally cooled to room temperature. The  $\eta$  was calculated according to a previously described method:

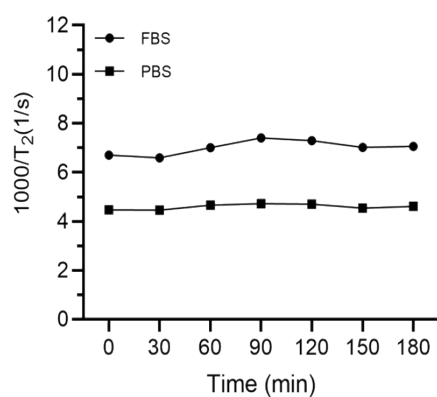

Figure S3 The stability of FeL<sub>3</sub>Mn<sub>3</sub> (0.2 mM) in the presence of 10 % FBS (at 37 °C) and the PBS solution (pH = 7.4, 10 mM) of FeL<sub>3</sub>Mn<sub>3</sub> was employed as the negative control.

$$\eta = \frac{hs(T_{Max} - T_{Surr}) - Q_{Dis}}{I(1 - 10^{-A808})} \quad (A1)$$

$$hs = \frac{mC}{\tau_s} \quad (A2)$$

$$t = -\tau_s \ln(\theta) \quad (A3)$$

$$\theta = \frac{T - T_{Surr}}{T_{Max} - T_{Surr}} \quad (A4)$$

**h** represents the heat transfer coefficient,

**s** represents the surface area of the container,

**h<sub>s</sub>** can be determined from the equation (A2),

$T_{\text{Max}}$  represents the maximum steady state temperature,

$T_{\text{Surr}}$  represents the ambient room temperature,

$Q_{\text{Dis}}$  represents heat dissipated from the laser mediated by the solvent and container,

$I$  represent the laser power and  $A$  is the absorbance at 808 nm.

$m$  represents the mass of the solution (g) containing the photoactive material,

$C$  approximate to the specific heat capacity of water,

$\tau_s$  represents the associated time constant, which can be determined from the equation (A3),

$t$  represents the time required to cool to room temperature,

$\theta$  represents the driving force temperature, which be calculated from the equation (A4),

$T$  represents instantaneous temperature during cooling.

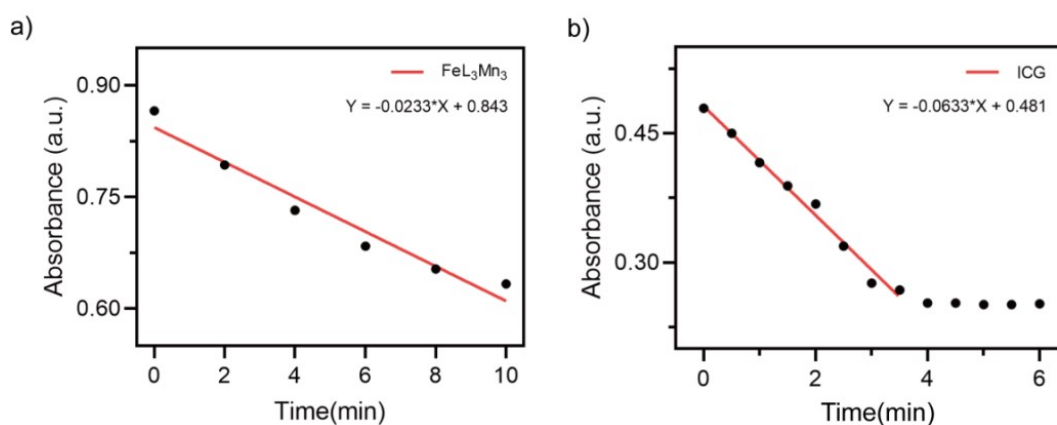

Figure S4  $^1\text{O}_2$  quantum yield measurement of FeL<sub>3</sub>Mn<sub>3</sub>. a) Decrease in absorbance intensity of DPBF recorded at 410 nm in the presence of FeL<sub>3</sub>Mn<sub>3</sub> as a function of irradiation time. b) Decrease in absorbance intensity of DPBF recorded at 410 nm in the presence of indocyanine green (ICG) as a function of irradiation time.

## 5. $^1\text{O}_2$ quantum yield measurement of FeL<sub>3</sub>Mn<sub>3</sub>.

When indocyanine green was selected as the reference compound ( $\Phi_{\Delta\text{ICG}} = 0.14$  in water), the

$^1\text{O}_2$  yield of FeL<sub>3</sub>Mn<sub>3</sub> was calculated by the following equation:  $\Phi_{\Delta\text{S}} = \Phi_{\Delta\text{ICG}} \cdot (k_{\text{S}} \cdot F_{\text{ICG}}) / (k_{\text{ICG}} \cdot F_{\text{S}})$ ,

where superscript S and ICG represent the FeL<sub>3</sub>Mn<sub>3</sub> and ICG respectively.  $k$  is the DPBF photobleaching rates (410nm).  $F$  is the absorption correction factor, which can be calculated

from  $F = 1 - 10^{-\text{OD}}$  (OD is the absorbance of samples at 808 nm).

## 6. Photothermal effect of $\text{FeL}_3\text{Mn}_3$ on BxPC-3 cells.

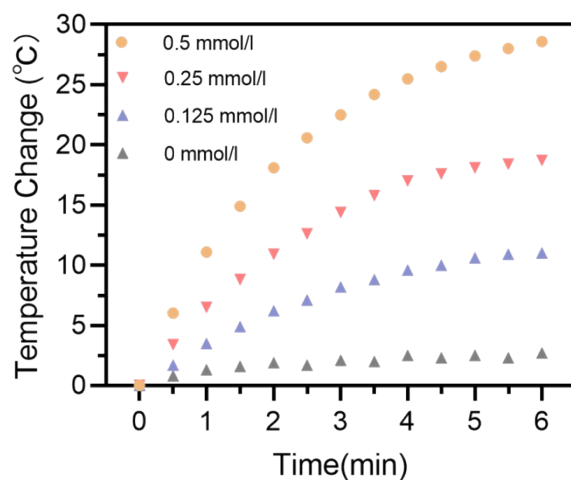

Figure S5 Hyperthermia heating curves of BxPC-3 cells media with  $\text{FeL}_3\text{Mn}_3$  at various concentrations (0, 0.125, 0.25, 0.5 mM) under 808 nm laser ( $2 \text{ W cm}^{-2}$ ) irradiation for 6 min.

## 7. Shielding of the photodynamic effect of $\text{FeL}_3\text{Mn}_3$ .

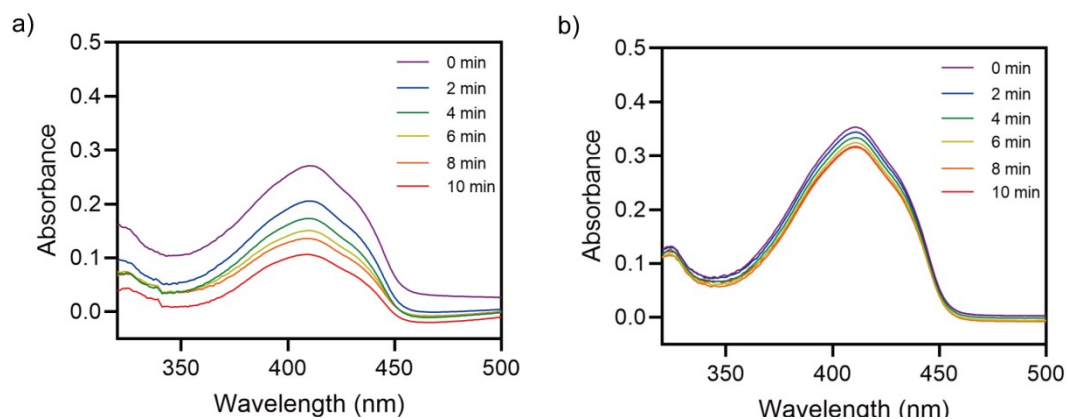

Figure S6 The change of absorption spectra of DPBF ( $20 \mu\text{M}$ ) mixed with  $\text{FeL}_3\text{Mn}_3$  ( $120 \mu\text{M}$ ) over time without (a) / with (b) ascorbate sodium ( $1.0 \text{ mM}$ ) under 808 nm laser irradiation ( $2.0 \text{ W cm}^{-2}$ )
